# Supplementary material for: Low-grade inflammation and tryptophan-kynurenine pathway activation are associated with adverse cardiac remodeling in primary hyperparathyroidism: the EPATH trial
Source: publisher site journal article supplement (doi:10.1515/cclm-2016-1159), 2017-01-01
Supplement: Supplementary file 1 [file Supplement Figure.docx]

**Supplemental Figure 1:** Flow diagram of EPATH participants who were in-/excluded in the present analyses.

EPATH, Eplerenone in Primary Hyperparathyroidism; ABPM, ambulatory blood pressure monitoring.
